# Supplementary material
Source: HighWire-hosted journal article supplement (https://erj.ersjournals.com/content/54/6/1902177)
Supplement: inline-supplementary-material-1 [file inline-supplementary-material-1.pdf]

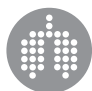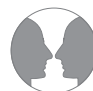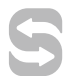

SHAREABLE PDF

# Acute hypoxaemic respiratory failure in immunocompromised patients: abandon bronchoscopy or make it better?

Philippe R. Bauer<sup>1</sup>, Sylvie Chevret<sup>2</sup> and Elie Azoulay<sup>3</sup>, on behalf of the Nine-I Investigators

**Affiliations:** <sup>1</sup>Pulmonary and Critical Care Medicine, Mayo Clinic, Rochester, MN, USA. <sup>2</sup>Biostatistics, Saint Louis hospital, Paris, France. <sup>3</sup>Intensive Care Unit, CHU Saint Louis, Paris, France.

**Correspondence:** Philippe R. Bauer, Mayo Clinic, Pulmonary and Critical Care Medicine, Gonda 18, 200 First Street SW, Rochester, MN, 55905, USA. E-mail: [bauer.philippe@mayo.edu](mailto:bauer.philippe@mayo.edu)

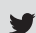

@ERSpublications

**The decision-making process regarding whether to perform bronchoscopy in acute respiratory failure in immunosuppressed patients is complex and does not depend solely on severity** <http://bit.ly/2O9cjcq>

**Cite this article as:** Bauer PR, Chevret S, Azoulay E. Acute hypoxaemic respiratory failure in immunocompromised patients: abandon bronchoscopy or make it better?. *Eur Respir J* 2019; 54: 1902177 [<https://doi.org/10.1183/13993003.02177-2019>].

This single-page version can be shared freely online.

## *From the authors:*

In their letter to the Editor, M.S. Zinter and G-S. Cheng raise concerns about the conclusion of our study that immunocompromised patients with acute hypoxaemic respiratory failure who undergo fiberoptic bronchoscopy have inferior survival relative to those who do not undergo fiberoptic bronchoscopy. They offer an alternative explanation to our findings by emphasising the role of the time-varying nature of the bronchoscopy as well as the time-varying nature of other covariates, including illness severity leading up to bronchoscopy, when performing the propensity score matching.
